# Supplementary material for: Apoptosis Induction via ATM Phosphorylation, Cell Cycle Arrest, and ER Stress by Goniothalamin and Chemodrugs Combined Effects on Breast Cancer-Derived MDA-MB-231 Cells
Source: Hindawi journal article supplement (doi:10.1155/2018/7049053), 2018-11-26
Supplement: f1 [file 7049053.f1.pdf]

Supplementary Figure 1

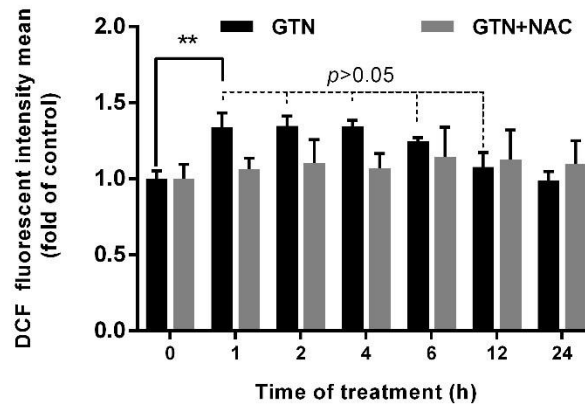

**Supplement Figure 1** A Bar graph showed DCF intensity of 50  $\mu$ M GTN treatment in MDA-MB-231 cells for 1 to 24 hours. It exhibited significant alteration at *an hour* when compared to without treatment ( $p < 0.05$ ) but *there* was no significant change among groups at 1 to 12 hours ( $p > 0.05$ )
